# Supplementary material
Source: PubMed Central journal article supplement (PMC4097587)
Supplement: JB.01666-14_zjb999093232so1.pdf [file JB.01666-14_zjb999093232so1.pdf]

1 **TABLE S1** Oligonucleotides used in this study

| Oligonucleotide | Sequence                                                                                                 |
|-----------------|----------------------------------------------------------------------------------------------------------|
| algO-F          | 5'-ATG GAG GCA CTG GCA GAT TAC AAG G-3'                                                                  |
| algO-R          | 5'-TCA GAC TGG GCG CGT ACT ATC GCG G-3'                                                                  |
| Km-F            | 5'-ATG AGC CAT ATT CAA CGG GAA ACG T-3'                                                                  |
| Km-R            | 5'-TTA GAA AAA CTC ATC GAG CAT CAA ATG AAA CT-3'                                                         |
| algO(pET21b)-F  | 5'-GAA GGA GAT ATA CAT ATG GAG GCA CTG GCA GAT TAC AAG G-3'                                              |
| algO(pET21b)-R  | 5'-TCA GTG GTG GTG GTG GTG GTG GAC TGG GCG CGT ACT ATC GCG-3'                                            |
| pET21b-inv-F    | 5'-CAC CAC CAC CAC CAC CAC TGA GAT CCG GCT-3'                                                            |
| pET21b-inv-R    | 5'-ATG TAT ATC TCC TTC TTA AAG TTA AAC AAA ATT ATT TCT AGA GG-3'                                         |
| algO-aly_F      | 5'-TGT CAA ACA TCG AAC TGT CTC C-3'                                                                      |
| algO-aly_R      | 5'-AGC CCC GAA TGC TCT ATC C-3'                                                                          |
| algS-M1_F       | 5'-TTG TCA TGG TGC TCC TCC TC-3                                                                          |
| algS-M1_R       | 5'-GCC CAG TCA CAG GCC TCT A-3'                                                                          |
| algM1-M2_F      | 5'-AGC CGC CGT ATC ACC AAG A-3'                                                                          |
| algM1-M2_R      | 5'-ATA GAA AGG TGT GGC GAG CA-3'                                                                         |
| algM2-Q1_F      | 5'-CGG AGG CGT AAA AGA ATA ACC A-3'                                                                      |
| algM2-Q1_R      | 5'-GCG AAC ATC AAT GCG GAA C-3'                                                                          |
| algQ1-Q2_F      | 5'-AGC CAA GTA ACG CAC GCA TC-3'                                                                         |
| algQ1-Q2_R      | 5'-TGC GAC GGA CAA CAT CAT C-3'                                                                          |
| algQ2-A1IV_F    | 5'-CAA GCC TAC GAC CGT CAA TAC A-3'                                                                      |
| algQ2-A1IV_R    | 5'-CTT CTT CAT CAC TCT GTC CTT CG-3'                                                                     |
| 202bp-F         | 5'-TGG ACT TCC TCC GGC CTT CC-3'                                                                         |
| 202bp-R         | 5'-TTT GCT CCT CCT TGG CCC GT-3'                                                                         |
| 146bp-F         | 5'-CGC ACG CAT CGC GCA GAA GA-3'                                                                         |
| 146bp-R         | 5'-GGT GCT TTG CTC CTC CGA GT-3'                                                                         |
| 234bp-F         | 5'-TCG CAT GAC CCA TGT CCC GG-3'                                                                         |
| 234bp-R         | 5'-CAC TCT GTC CTT CGT TGT CG-3'                                                                         |
| 94 bp-F         | 5'-TGT CGA ATC ATT CGC CGC AAC AGC AAA AAC GAT T-3'                                                      |
| 94 bp-R         | 5'-TTT GCT CCT CCT TGG CCC GT-3'                                                                         |
| 72 bp-sense     | 5'-TGG ACT TCC TCC GGC CTT CCT GCG TCG ATT TAG TTG TGA GTG CGA TTC TAG<br>TTT CCA GAA TCT TTC TGG CAA-3' |
| 72 bp-antisense | 5'-TTG CCA GAA AGA TTC TGG AAA CTA GAA TCG CAC TCA CAA CTA AAT CGA<br>CGC AGG AAG GCC GGA GGA AGT CCA-3' |
| 69 bp-sense     | 5'-CTG CGG GTT TTC CGC AAG TGT GGA AAT TTC TCG AAT GTC GAA TCA TTC GCC<br>GCA ACA GCA AAA ACG ATT-3'     |
| 69 bp-antisense | 5'-AAT CGT TTT TGC TGT TGC GGC GAA TGA TTC GAC ATT CGA GAA ATT TCC ACA<br>CTT GCG GAA AAC CCG CAG-3'     |
| 35 bp-sense     | 5'-CTG CGG GTT TTC CGC AAG TGT GGA AAT TTC TCG AA-3'                                                     |
| 35 bp-antisense | 5'-TTC GAG AAA TTT CCA CAC TTG CGG AAA ACC CGC AG-3'                                                     |
| 34 bp-sense     | 5'-TGT CGA ATC ATT CGC CGC AAC AGC AAA AAC GAT T-3'                                                      |
| 34 bp-antisense | 5'-AAT CGT TTT TGC TGT TGC GGC GAA TGA TTC GAC A-3'                                                      |
